# Not all pathways are the same – unique adaptations to submerged environments emerge from comparative seagrass genomics

## AUTHORLIST

Philipp E Bayer<sup>1,2,†</sup>, Matthew W. Fraser<sup>1,3,†</sup>, Belinda C. Martin<sup>1,3,4</sup>, Jakob Petereit<sup>1</sup>, Anita A. Severn-Ellis<sup>1,5</sup>, Elizabeth A. Sinclair<sup>1,3</sup>, Jacqueline Batley<sup>1</sup>, Gary A. Kendrick<sup>1,3</sup>, David Edwards<sup>1,2,\*</sup>

## AFFILIATIONS

- 1) School of Biological Sciences, University of Western Australia, Perth, WA, Australia
- 2) The Centre for Applied Bioinformatics, University of Western Australia, Perth, WA, Australia
- 3) Oceans Institute, University of Western Australia, Perth, WA, Australia
- 4) Ooid Scientific, North Lake, WA, Australia
- 5) Aquatic Animal Health, Department of Primary Industries and Rural Development, Watermans Bay, WA, Australia

## ORCID

Philipp E. Bayer: 0000-0001-8530-3067

Matthew W. Fraser: 0000-0003-2309-8074

Belinda C. Martin: 0000-0002-0354-2628

Jakob Petereit: 0000-0003-2159-0380

Anita A. Severn-Ellis: 0000-0003-3077-9441

Elizabeth Sinclair: 0000-0002-5789-8945

Jacqueline Batley: 0000-0002-5391-5824

Gary A. Kendrick: 0000-0002-0276-6064

David Edwards: 0000-0001-7599-6760

† Philipp E. Bayer and Matthew W. Fraser contributed equally to this paper.

\*to whom correspondence should be addressed: [dave.edwards@uwa.edu.au](mailto:dave.edwards@uwa.edu.au)

## Abstract

Seagrasses are an ecologically important group of plants that have returned to the sea from terrestrial ancestors on at least three occasions (Cymodoceaceae, Posidoniaceae, Zosteraceae). Seagrass-specific genomic adaptations to marine life are known from the Zosteraceae. However, independent lineages may have devised different solutions to life underwater. Here, we present two new genome assemblies from endemic Australian seagrasses, *Amphibolis antarctica* (Cymodoceaceae) and *Posidonia australis* (Posidoniaceae). We found large differences in genome size between *Amphibolis* and *Posidonia* driven by repeat expansion in *Posidonia*. We show that parts of ethylene pathways known to be lost in Zosteraceae are partially retained in older seagrass lineages (Cymodoceaceae and Posidoniaceae). We describe adaptations within salinity, disease resistance, cell wall, and photosynthesis-related pathways not shared with other seagrasses. These findings provide insight into the impact of recolonising marine environments on formerly terrestrial plant genomes, with some adaptations previously thought to be universal to marine living not having occurred in *A. antarctica* and *P. australis*.

## Introduction

Seagrasses are a group of marine angiosperms in a unique ecological niche as the only flowering plants that can survive permanently submerged in saline waters. They exist in coastal environments surrounding every continent except Antarctica, forming critical habitats that contribute to ecosystem functions and services. Seagrasses support diverse food webs from microbes to megafauna, including commercial fisheries, improve water quality by increasing sediment settling rates and uptake of dissolved nutrients, and sequester vast amounts of carbon in underlying sediments (Aragones *et al.*, 2006; Fourqurean *et al.*, 2012; Fredley *et al.*, 2019; Leigh *et al.*, 2018). However, ecosystem functions and services continue to be eroded as global seagrass meadows

decline. Historically, these erosions occurred due to poor water quality owing to adjacent anthropogenic land use. More recently, erosions have occurred due to climate-related impacts, such as marine heatwaves and extreme floods (Fraser *et al.*, 2014). Marine restoration has been proposed as a tool to combat this global decline, but marine restoration has had mixed success at meaningful scales (Abelson *et al.*, 2020; Fraschetti *et al.*, 2021; Orth *et al.*, 2020). More recently, the use of climate-resilient genotypes has been suggested to improve the success of marine restoration (Breed *et al.*, 2019). Additional genome assemblies across seagrass genera will inform the conservation or restoration of these economically important species.

Seagrasses are polyphyletic as independent lineages have evolved separately from terrestrial ancestors in at least three return-to-sea events (Les *et al.*, 1997). These events are reflected in three families: Zosteraceae, Hydrocharitaceae and Posidoniaceae/Cymodoceaceae within one order, Alismatales. These three families formed 100 MYA, with the ancestors of Zosteraceae and Cymodoceaceae diverging around 80 MYA (Janssen and Bremer, 2004).

The earliest study in this field used expressed sequence tags (ESTs) comparing expressed genes in *Zostera marina* and *Posidonia oceanica*, finding photosynthesis genes under positive selection (Wissler *et al.*, 2011). This analysis was extended later using the first fully sequenced genome for a seagrass (*Z. marina*, Olsen *et al.* 2016), finding that the loss of ethylene and cell wall genes was associated with adaptation to a marine environment (Golicz *et al.*, 2015). Similar findings were made in the *Z. muelleri* genome assembly (Lee *et al.*, 2016). A recent study found ethylene genes *EIN2*, *CTR1*, and *ERS* present in Posidoniaceae and confirmed their loss in Zosteraceae (Chen *et al.*, 2022). The latest Zosteraceae genome to be published was an improved version of the *Z. marina* assembly using long-read technology (Ma *et al.*, 2021c). There is no published genome assembly for members of the Hydrocharitaceae, but genomic reads were used to investigate gene loss in *Halophila ovalis* (Hydrocharitaceae), finding that NADH dehydrogenase (*ndh*) genes are lost in *H. ovalis* but present in *Zostera* (Lee *et al.*, 2018).

In this study, we assembled two new draft genomes from representatives of two Australian seagrass lineages that have independently returned to the sea, *Amphibolis antarctica* (Cymodoceaceae) and *Posidonia australis* (Posidoniaceae). These two species diverged shortly after the formation of Alismatales, approximately 95 MYA, while the *Amphibolis* spp. - Zosteraceae split was approximately 83 MYA (Kumar *et al.*, 2017). This divergence represents a much earlier split among taxa for which whole genomes have been sequenced, as the ancestors of *Z. muelleri* and *Z. marina* diverged 39 to 21 MYA (Kato *et al.*, 2003; Les *et al.*, 2003). We compared the two new assemblies with the two published *Zostera* genomes (Zosteraceae; (Lee *et al.*, 2016; Ma *et al.*, 2021c; Olsen *et al.*, 2016)) and other aquatic plants, such as duckweeds, algae and terrestrial plants. Our findings provide new insight into the genomic changes in plants associated with different pathways for adaptation to marine life.

## Results

### Two new genome assemblies for *Amphibolis* and *Posidonia*

We constructed genome assemblies of *Amphibolis antarctica* and *Posidonia australis* (Table 1, Supplementary Table 1) and compared the results with two existing genome assemblies for *Z. marina* and *Z. muelleri*. The two assembled genomes show a large difference in size, with an assembly size of 244 Mbp for *A. antarctica* and 1,215 Mbp for *P. australis*. These differences in assembly size are not reflected in the number of predicted genes, with 16,176 and 21,126 gene models for *A. antarctica* and *P. australis*, respectively (Supplementary Figure 1, 2, 3, 4, Supplementary Table 2, 3).

### Convergent adaptations in gene content

We compared the gene content of *Arabidopsis thaliana* candidate genes linked with disease resistance, stomata development, ethylene synthesis and signalling, terpenoid biosynthesis, and chloroplast and mitochondrial genes across the four seagrasses (Figure 1, Supplementary Table 4, 5, 6). Annotation-based orthologues via Orthofinder (Emms and Kelly, 2019) and direct read-alignment

of seagrass genomic reads with *A. thaliana* coding sequences (CDS) were compared for a complete overview.

Seagrasses were found to contain very few disease resistance genes compared to terrestrial plants (Supplementary Figure 5). The genomes of *A. antarctica*, *P. australis*, *Z. marina*, and *Z. muelleri* contain only 739, 588, 755, and 1,256 NLR genes, respectively, which is much lower than in terrestrial plants such as *A. thaliana* (3,415 NLRs) or *B. distachyon* (3,058 NLRs). The RLP content is similar between terrestrial plants and seagrasses, with a median of 297 RLPs and 1,308 RLKs in the four seagrasses compared with 752 and 750 RLPs and 958 and 2,789 RLKs in *A. thaliana* and *B. distachyon*, respectively. Median RLK gene counts across seagrasses showed no reduction compared with terrestrial plants, with a median of 1,308 RLKs in seagrasses and 958 and 2,789 RLKs in *A. thaliana* and *B. distachyon*, respectively.

Ethylene genes were previously reported as lost in *Zostera* and *Halophila*, potentially due to the gaseous nature of the ethylene hormone and its lack of function in a submerged marine environment (Golicz *et al.*, 2015; Lee *et al.*, 2016; Olsen *et al.*, 2016). In contrast, we found ethylene pathways are partially present in *A. antarctica* and *P. australis* (Figure 1A). The 1-aminocyclopropane-1-carboxylic acid (ACC) oxidases *ACO1*, *ACO2*, *ACO4*, and *ACO5* are lost in *A. antarctica*, *Z. marina* and *Z. muelleri*, but *ACO1*, *ACO2*, and *ACO4* are present in *P. australis*. Nine ACC synthases are lost in *Z. marina* and *Z. muelleri*, but all nine are present in *A. antarctica* and six are present in *P. australis*. The ethylene receptor *ERS1* is lost in *Zostera* but present in *A. antarctica* and *P. australis*. Seven ethylene receptors lost in *A. antarctica* (*CTR1*, *EBF1*, *EBF2*, *EIN1*, *EIN4*, *ETR2*, and *EIN2*) are present in *P. australis*.

*EIN3* was one of the few ethylene-pathway genes conserved in all seagrasses. We compared the *EIN3* proteins at the sequence level to determine whether these copies have diverged and perhaps neofunctionalised (Figure 2). The orthologues show a high level of divergence, except for a conserved region of approximately 150 amino acids at the beginning of *EIN3*. All terrestrial plant

orthologues contain an uncharged region at 350 amino acids which is absent in three *Zostera* orthologues (*ZmuEIN3.1*, *ZmuEIN3.2*, *ZmaEIN3.1*). EIN3 orthologues exhibit size differences, ranging from 389 amino acids to 643 amino acids (median: 593 amino acids), yet all orthologues contain the ‘Ethylene insensitive 3’ Pfam domain (PF04873). These observations are consistent with a phylogeny of these sequences (Supplementary Figure 6), where seagrasses form a group distinct from terrestrial grass (*Oryza*), within which the *P. australis* orthologue *PaEIN3* shows the greatest sequence divergence from the Zosteraceae orthologues.

To examine chloroplast-specific adaptations to marine life, we assembled and annotated the chloroplast genomes of *A. antarctica* and *P. australis* and reannotated the available chloroplast genomes of *Z. marina* and *Z. muelleri*. We then compared the chloroplast gene content with the *A. thaliana* chloroplast annotation to examine potential chloroplast and photosynthesis-specific adaptations to marine life. Chloroplast ribosomal genes show diverse presence and loss in the seagrass chloroplast genomes. The *rpl22* gene encoding chloroplast ribosomal protein CL22 was thought to be essential for survival in terrestrial plants, but deletion in *Nicotiana tabacum* resulted in no phenotypic changes (Fleischmann *et al.*, 2011). *Rpl22* is not present in the plastomes of non-green plants *Eimeria tenella*, *Theileria parva*, and *Toxoplasma gondii* (Fleischmann *et al.*, 2011) and legumes, where it was transferred to the nuclear genome (Gantt *et al.*, 1991). In the seagrasses studied here, the *rpl22* gene is truncated by 17% to 24% in the *A. antarctica* and *P. australis* chloroplast annotations and absent in the *Z. marina* and *Z. muelleri* annotations, contrary to earlier studies in *Zostera* (Chen *et al.*, 2021). Similarly, *rps16* is present only in the chloroplast genome annotations of *P. australis* and lost in the Zosteraceae.

Chloroplast *ndh* genes were previously thought central to photosynthesis but are lost in many orchids (Kim *et al.*, 2015a; Lin *et al.*, 2017), carnivorous plants (Lin *et al.*, 2021; Wicke *et al.*, 2014), and in some seagrasses, such as *H. ovalis* (Lee *et al.*, 2018), but not *Z. marina* (Olsen *et al.*, 2016). In the *A. antarctica* chloroplast annotation, only *ndhC* is present, while *ndhD*, *ndhG*, and *ndhH* are

shorter by more than 50% compared to the *A. thaliana* genes, indicating they may have pseudogenised (Figure 1B, Supplementary Table 7). In *P. australis*, only *ndhC* and *ndhK* are completely present while *ndhE* is more than 50% shorter than the *A. thaliana* orthologue, indicating that it may have pseudogenised. The *ndh* complex is conserved and functional in *Zostera* (Lee *et al.*, 2018; Ma *et al.*, 2021b; Tan *et al.*, 2020) which is confirmed by our *Z. marina* and *Z. muelleri* chloroplast re-annotations where all *ndh* genes are present.

Nuclear genes involved in *ndh*-complex-related pathways show a similar pattern (Figure 1C). Eighteen nuclear *ndh* genes are lost in *A. antarctica* and *P. australis* but conserved in *Z. marina* and *Z. muelleri*. Four genes are conserved across the four seagrasses: *PnsL5*, *PGR5*, *PRGL1A*, and *CRR2*.

Studies in *Z. marina* and *Z. muelleri* found genes involved in stomatal generation and differentiation to be lost (Golicz *et al.*, 2015; Lee *et al.*, 2016; Olsen *et al.*, 2016). We found the same for *A. antarctica* and *P. australis* (Figure 1D). Only *SCRM2/SCREAM2*, a transcription factor involved in stomatal differentiation (Kanaoka *et al.*, 2008), is preserved with one copy in *A. antarctica*, *Z. marina* and *Z. muelleri* and two copies in *P. australis*.

Salt Overly Sensitive pathways (SOS1-3) are the best-characterised salinity pathways in plants (Ji *et al.*, 2013). Salinity-related GO-terms are enriched in genes present in all four seagrasses indicating a high degree of conservation. *SOS1*, *SOS2*, and *SOS3* are all present in seagrasses. *SOS2* has one orthologue in all seagrasses but two copies in *A. antarctica*. Only *SOS3* (also known as *CBL4*) shows several orthologues in the seagrasses, with one copy in *A. antarctica*, two in *P. australis*, three in *Z. marina*, and five copies in *Z. muelleri*. A phylogeny of these protein sequences showed considerable sequence diversity among seagrasses copies (Supplementary Figure 7). The phylogeny forms two groups, with one terrestrial group containing *O. sativa CBL4/SOS3 (OsCBL4)* and multiple *Z. marina* and *Z. muelleri* copies, and a separate aquatic group. The additional *Zostera* copies *ZmaSOS3.2*, *ZmuSOS3.4*, and *ZmuSOS3.5* show considerable divergence not represented in the two included terrestrial plants.

A comparison of the *SOS3* orthologues at the protein-level (Figure 3) shows the core of the protein is highly conserved between *O. sativa* and *Z. marina* and *Z. muelleri*, while one *P. australis* copy shows substantial divergence with additional amino acids. All seagrasses contain additional uncharged amino acids at the beginning of proteins ranging from 13 amino acids in *Z. marina* and *Z. muelleri* to 205 amino acids in *A. antarctica*. We chose an additional set of 11 known *Arabidopsis* salinity resistance candidate genes (DeRose-Wilson and Gaut, 2011) and compared the presence/absence of these genes across seagrasses (Supplementary Table 5). Three to four salinity genes were lost, with *RDA29A* and *RDA29B* not present in *A. antarctica*, *P. australis*, *Z. marina*, and *Z. muelleri*, but present in the three duckweeds. The *A. thaliana* gene AT5G12010 involved in salt stress has no orthologue in *A. antarctica* or *P. australis*, but it has an orthologue in *Z. marina* and *Z. muelleri*.

*Z. marina* and *Z. muelleri* have lost all terpene biosynthesis genes (Lee *et al.*, 2018; Olsen *et al.*, 2016). *A. thaliana* terpenoid biosynthesis genes *TPS-CIN*, *TPS23*, *TPS03*, *TPS10*, and *TPS24* were clustered into one orthogroup containing no *A. antarctica* orthologues in this cluster, which is confirmed by no *A. antarctica* reads aligning with the *A. thaliana* CDS. The *P. australis* annotation, on the other hand, contains one terpenoid orthologue, as revealed by Orthofinder clustering. However, no *P. australis* reads align with the *A. thaliana* terpenoid biosynthesis genes, possibly due to sequence divergence.

We compared the gene content of the four seagrass genomes with the annotations of aquatic duckweeds (*Spirodela polyrhiza*, *Wolffia australiana*), microalgae (*Ostreococcus lucimarinus*, *Chlamydomonas reinhardtii*), and terrestrial plants (*Amborella trichopoda*, *Arabidopsis thaliana*, *Brachipodium distachyon*, *Oryza sativa*, *Physcomitrella patens*, *Populus trichocarpa*, *Selaginella moellendorffii*, *Thellungiella salsuginea*, *Vitis vinifera*, and *Zea mays*) by clustering protein-sequences using OrthoFinder. Duckweeds, microalgae, and seagrasses had a similar number of unique genes, with 1,498 (5%), 1,669 (5%), and 2,327 (8%) of orthogroups being specific to each respective group (Figure 4A, Supplementary Table 8). Most orthogroups included genes that are shared with terrestrial plants, with 6,058 (19%) orthogroups only containing genes from aquatic



plants. Only 5,112 (17%) orthogroups had representative genes from all four groups, with orthogroups containing genes from all terrestrial plants alone, making up the bulk of orthogroups (13,748, 45%).

We compared orthogroups unique and shared across the four seagrasses to examine seagrass-specific adaptations to underwater life (Figure 5A). The majority (6,534, 51%) of orthogroups were present in all four species. Of these, 2,983 (24%) were present in both *Zostera* species, but not in *A. antarctica* and *P. australis*. *Z. muelleri* had the largest number of unique orthogroups, with 1,262 (10%), consistent with its known whole-genome duplication event and subsequent functional diversification. Few orthogroups were present only in the two seagrasses *A. antarctica* and *P. australis* (1,421, 11%).

We then compared Gene Ontology (GO)-terms enriched across duckweeds, microalgae, seagrasses, and terrestrial plants, and then across the four seagrasses. Enriched GO-terms present in terrestrial plants but lost in the duckweeds, microalgae, and seagrasses included cell wall biogenesis-related GO-terms such as ‘plant-type cell wall loosening’ (GO:0009828); ‘defense response’ (GO:0006952); ‘terpene biosynthesis’ (GO:0051762) and various morphology-related terms such as ‘meristem development’ (GO:0048509), ‘root meristem growth’ (GO:0010082), and ‘root development’ (GO:2000280) (Figure 4B). The GO-terms ‘RNA-dependent DNA biosynthetic process’ (GO:0006278) and ‘transposition, RNA-mediated’ (GO:0032197) were enriched in seagrasses. GO-terms enriched in all seagrasses included ‘response to salt stress’ (GO:0009651) and ‘positive regulation of gene expression’ (GO:0010628).

Genes present in duckweeds and microalgae but lost in seagrasses and terrestrial plants were enriched for GO-terms such as ‘response to ethylene’ (GO:0009723), ‘floral whorl development’ (GO:0048438), or ‘wax biosynthesis’ (GO:0010025). Conversely, genes present in seagrasses but lost in duckweeds, microalgae, and terrestrial plants were enriched for GO-terms including ‘proteolysis

involved in cellular protein catabolic process' (GO:0051603) and 'RNA-dependent DNA biosynthetic process' (GO:0006278).

Lastly, we compared genes lost in the four seagrass species to determine which processes may be species-specific adaptations instead of general adaptations to aquatic life (Figure 5B). Genes present in all four seagrasses are enriched for GO-terms, including 'response to salt stress' (GO:0009651) and 'positive regulation of gene expression' (GO:0010628). In both *P. australis* and *A. antarctica*, genes lost compared to *Z. marina* and *Z. muelleri* are enriched for GO-term including 'RNA-dependent DNA biosynthetic process' (GO:0006278) and 'RNA modification' (GO:0009451).

The reduced morphology complexity of *A. antarctica* roots compared with other seagrasses is reflected in lost genes enriched for 'lateral root branching' (GO:0080181). *A. antarctica* has uniquely lost genes related to jasmonic acid signalling potentially due to different signalling pathways ('cellular response to jasmonic acid stimulus' (GO:0071395), 'response to jasmonic acid stimulus involved in jasmonic acid and ethylene-dependent systemic resistance' (GO:0032260), and 'jasmonic acid metabolic process' (GO:0009694)).

Only in *Z. marina* are some genes associated with cell wall genesis lost ('plant-type cell wall organisation or biogenesis', GO:0071669). *Z. marina* has also lost genes enriched for arsenite and arsenate transport GO-terms ('arsenite transport', GO:0015700, 'arsenate ion transmembrane transport', GO:1901684), so it may not be able to tolerate arsenic as well as other seagrasses. *Z. muelleri* has been shown to not accumulate arsenic as well as green or red macroalgae (Maher *et al.*, 2011; Price *et al.*, 2012), while other seagrasses such as *Halophila ovalis* have been shown to be able to accumulate arsenic (Martin *et al.*, 2022). These differences in accumulation ability are likely due to losses of arsenite and arsenate transporters in *Zostera* spp.

Compared with the other seagrasses, *Z. muelleri* has lost genes related to light stimuli ('cellular response to light stimulus', GO:0071482) and 'proteolysis involved in cellular protein catabolic process' (GO:0051603). Contrary to gene losses unique to single seagrass species, substantially

fewer GO-terms were uniquely present in the four seagrasses. No uniquely present GO-terms were found in *A. antarctica*, while five GO-terms were unique in *P. australis*. These five GO terms included 'starch catabolic process' (GO:0005983) and 'response to cadmium ion' (GO:0046686). The largest number of uniquely present GO-terms were found in *Z. marina* (21 GO-terms, including 'response to heat' (GO:0009408)) and *Z. muelleri* (15 GO-terms, including 'positive regulation of wound healing' (GO:0090303)).

The large genome size of *P. australis* compared with the other genomes is due to the expansion of repetitive elements and not due to whole-genome duplication. We reannotated repetitive elements in the four genomes to determine whether transposon (TE) expansion and loss led to the difference in genome sizes of the four genomes (Figure 6, Supplementary Table 3). We found more LTR-TEs in the *P. australis* genome compared to the other three genomes, with a total LTR-repeat size of 611 Mbp, compared with 46 Mbp, 124 Mbp, and 164 Mbp in *A. antarctica*, *Z. marina* and *Z. muelleri*, respectively. The small *A. antarctica* genome contained the lowest proportion of repetitive elements across the compared assemblies (47%). In *Z. muelleri*, the cumulative size of DNA repeat lengths was larger by 115 Mbp compared to *Z. marina* (142 Mbp and 27 Mbp in *Z. muelleri* and *Z. marina*, respectively), while LTR repeat content remained similar (164 Mbp and 123 Mbp, respectively), most likely an outcome of whole-genome duplication with subsequent loss of LTR-TEs. Similar mechanisms of genome size reduction due to LTR-TE loss have been observed in terrestrial plants (Devos *et al.*, 2002; Vitte and Panaud, 2005), where a whole-genome duplication led to associated identical repeat expansion followed by class-specific loss of repeats.

We analysed sequence divergence measured by Kimura distance within the four genomes' TE content (Supplementary Figures 8-11). Only the *Z. marina* genome showed a burst of recent TE activity indicated by low Kimura substitution levels (< 5 Kimura substitution level), with no such recent TE bursts in *Z. muelleri*, *P. australis* or *A. antarctica*. Interestingly, the TE expansion in the *P. australis* genome is older than in the other seagrasses, with a peak Kimura substitution level of 30 to

35 for DNA-TEs and 40 to 45 for LINE-TEs. Other seagrasses showed younger TE expansion peaks, such as in *A. antarctica* at Kimura distance of 12 and 22 for DNA repeats.

## Discussion

### Two new assemblies for *Amphibolis* and *Posidonia*

Here we presented two new assemblies for *A. antarctica* and *P. australis*. The assemblies are at draft stage, but as they are the first available assemblies for these two families, they form a valuable basis for research into the evolutionary adaptation of plants to life at sea. The genome assembly of *A. antarctica* is the smallest seagrass genome assembly to date, while the *P. australis* genome assembly is the largest available seagrass genome assembly.

There is strong evidence for a whole-genome duplication in *Z. muelleri* (Lee *et al.*, 2016), but the larger assembly size of *P. australis* is not due to whole-genome duplication (WGD) as the number of gene models is close to the other non-WGD seagrasses (21,126 gene models compared with 20,450 and 16,176 in *Z. marina* and *A. antarctica*, respectively). A recent study on WGDs in Alismatales also found no evidence for WGD in *Posidonia* (Chen *et al.*, 2022). Rather, the large genome size of *P. australis* is due to greater repeat expansion than *A. antarctica*. In *A. antarctica*, we observed several peaks in Kimura distances between TEs, indicating several rounds of TE expansion, followed by immediate TE shrinkage leading to today's small *A. antarctica* genome.

One class of repetitive element, MULEs, are entirely missing in *A. antarctica*, indicating that the *Amphibolis* lineage may have diverged from the *Posidonia* lineage before these transposable elements inserted in seagrass genomes, even though the horizontal transfer of MULEs is widespread in animals (Dupeyron *et al.*, 2019). In rice, MULEs have been linked with the rearrangement and amplification of functional gene fragments (Jiang *et al.*, 2004), indicating that this mechanism of generating gene diversity may be missing in *A. antarctica*. However, another class of repetitive

elements, Helitrons, are also linked with generating gene diversity (Dong *et al.*, 2011) and are expanded in the *A. antarctica* genome.

## Convergent adaptation in gene content

As observed in other seagrasses, we observed a reduction of NLR content in *A. antarctica* and *P. australis* (Olsen *et al.*, 2016). Similar losses in genes involved in the downstream signalling of NLRs have been observed in aquatic plants. These include convergent loss of the Enhanced Disease Susceptibility 1 (EDS1), Hytoalexin Deficient 4 (PAD4) and Activated Disease Resistance-like 1 (ADR1) disease-downstream signalling pathway in Alismatales (aquatic plants including seagrasses) and Lentibulariaceae (carnivorous plants) (Baggs *et al.*, 2020), which is also involved in drought tolerance (Chini *et al.*, 2004). This pathway has recently been proposed as a central convergence point for defence signalling cascades (Pruitt *et al.*, 2021). As observed in *Z. marina* and *Utricularia gibba* (Baggs *et al.*, 2020), we found these three genes were entirely lost in all four seagrasses and three duckweeds, supporting their loss either as adaptation to aquatic life or due to redundancy.

A second resistance pathway found by Baggs *et al.* (2020) to be absent in Alismatales and Lentibulariaceae are the RNLs: *NRG1*, *NRG1.2*, *NRG1.3*, *ADR1*, *ADR1-L1*, *ADR1-L2*, *ADR1-L3*, and *RPW8*. We also found these genes to be absent in all four seagrasses and three duckweeds studied here. Furthermore, we found no RNLs and no protein carrying the RPW8 domain in *A. antarctica* or *P. australis*. The RPW8 domain is present in early land plants and still extant in *Physcomitrella* (Zhong and Cheng, 2016), so these RNLs may have been lost during adaptation to aquatic life or have become redundant. The RNL pathway is also involved in stomatal closure (Chini *et al.*, 2004), so it may have been lost as part of the general loss of genes involved in stomatal pathways, as seagrasses do not have stomata. The two new genomes presented here will form the basis for future research into seagrass mechanisms of disease resistance and provide future opportunities to monitor diseases such as wasting disease, which is predicted to worsen with climate change (Graham *et al.*, 2021).

We found differences in the ethylene gene content across the studied seagrasses. Unlike Zosteraceae, both ethylene-producing and ethylene-sensing groups of genes are present in *P. australis*. These findings indicate that the ethylene pathway may be functional in *P. australis* as only a few ethylene pathway-related genes are lost and confirm similar findings of a partial presence of ACC synthases and oxidases in Posidoniaceae (Chen *et al.*, 2022). Ethylene plays an important role in hypoxia survival and metabolic acclimation during submergence in terrestrial plants (Hartman *et al.*, 2021). Seagrasses can experience extended hypoxic stress, particularly at night when low water movement can limit gas exchange, as shown for *Posidonia sinuosa*, a close relative of *P. australis* (Olsen *et al.*, 2018). Ethylene may play a similar role in enhancing survival during hypoxia, which may be more prevalent in larger species, such as *Posidonia*, which have greater respiratory demands. However, the role of ethylene in larger seagrasses requires physiological and biochemical confirmation.

In *A. antarctica*, only ethylene-precursor-producing genes ACC synthases are present, while the entire ethylene pathway, including *EIN3* (present in *Z. marina* and *Z. muelleri*) is lost. *A. antarctica* may use ACC to feed bacteria in a mutualistic relationship as has been proposed in terrestrial plants, where many ACC deaminases (ACCD) have been discovered in rhizomes in the presence of plant-mutualistic bacteria (Singh *et al.*, 2015). ACC deaminases in bacteria break down ACC into ammonia and  $\alpha$ -ketobutyrate, which are then further metabolised. Such relationships have been observed in *Zostera marina* and *Z. japonica* (Crump *et al.*, 2018), but the microbiome of *A. antarctica* has not been studied, and no links between ACC and ACCD are known in seagrasses. The interaction between ACC synthases and mutualistic bacteria in *A. antarctica* will be the focus of future studies. A summary of our model of remaining ethylene pathways in seagrasses is presented in Figure 7. Comparing *EIN3* orthologues at the sequence level revealed a highly conserved core region with no losses of the 'Ethylene insensitive 3' Pfam domain, indicating that all *EIN3* orthologues were functional and involved in similar roles across the plants studied.

We found different patterns of *ndh* gene complex losses across the seagrasses studied. The shared presence of *ndhC* and the shared truncated version of *ndhH* and *ndhK* in *A. antarctica* and *P. australis* chloroplast genomes indicates that the *ndh* gene complex is lost in a similar order, with *ndhC* being the last gene to be lost, even though *ndhC*, *ndhK*, and *ndhJ* are co-located in the same *ndhC* operon and may be expected to be lost together (Meurer *et al.*, 1996). Similarly, *ndhA*, *ndhD*, *ndhE*, and *ndhG-I* are co-located in the same operon with *psaC*, yet *psaC* is highly conserved and present in all seagrass chloroplast annotations, while most of these surrounding *ndh* genes are lost. This supports the central role of *psaC* in plant survival as it is retained across all four seagrass families.

Four nuclear *ndh*-complex-related genes are present in all four seagrasses, including *PnsL5*. *PnsL5* (also known as *AtCYP20-2*) may not be a subunit of *ndh*, as *A. thaliana* mutants lacking *PnsL5* show unmodified *ndh* activity (Sirpiö *et al.*, 2009), so it fulfils an as yet unidentified, but important role causing its retention.

The *PGR5/PRGL1* pathway is the main PS1 cyclic electron transport in angiosperms, along with the chloroplast *ndh*-complex dependent pathway (Shikanai, 2014). We found *PGR5* and *PRGL1* genes to be conserved in the four seagrass genomes. The genes *PGR5* and *PRGL1A* are important for cyclic electron transport and in protecting photosystem I and II (Ma *et al.*, 2021a; Munekage *et al.*, 2002). This pathway is especially important in protecting photosystems under fluctuating light conditions (Yamori *et al.*, 2016), a common feature in aquatic environments. Therefore, conservation of this pathway may have been preferred to PS1 cyclic electron transport functions provided by a loss of the *ndh* pathway.

The fourth *ndh*-complex-related gene conserved across seagrasses is *CRR2*. *CRR2* encodes for a Pentatricopeptide repeat (PPR) protein (Ruwe *et al.*, 2019) which is essential for the expression of *ndhB* (Hashimoto *et al.*, 2003). Since *ndhB* is lost in all seagrasses still carrying *CRR2*, *ndhB* may not

be the only binding target of *CRR2*. Further studies will focus on identifying additional binding targets for *CRR2*.

We found all stomata generation-related genes except *SCRM2* were lost as seagrasses have generally lost stomata in adaptation to underwater life. Of the stomata-related genes, we found only *SCRM2* to be conserved, with about 50% of its sequence covered by reads of all species and orthologues found in all orthogroups, which confirms the findings of Chen *et al.* (2022). *SCRM2* (*SCREAM2*) encodes a transcription factor typically involved in all stages of stomata generation (Kanaoka *et al.*, 2008). However, as a transcription factor, it is also involved in other key processes, especially cold acclimation (Kim *et al.*, 2015b), which may have prohibited *SCRM2* from being lost.

We compared cell wall generation-related gene content across the seagrasses. *Z. marina* has lost the cell wall biogenesis-related genes present in *A. antarctica* and *P. australis*, indicating further cell wall-related morphological changes in addition to the general seagrass-related cell wall changes. These changes are confirmed by the lack of lignin in *Zostera* cell walls, conversely present in the *A. antarctica* and *P. australis* cell walls (Pfeifer *et al.*, 2022).

Salinity tolerance is essential for survival in the saline ocean. We observed almost no loss in salinity tolerance genes, but we did identify divergent copies of salinity-pathway-involved genes, especially in *SOS3*. Transgenic *Arabidopsis* plants overexpressing *SOS3* show increased salt tolerance (Yang *et al.*, 2009). It is possible to transgenetically introduce *SOS* copies from halophile plants to increase salinity resistance (Liu *et al.*, 2021). The additional diverged copies of *SOS3* in the seagrasses are likely diverged to handle high-salinity conditions, which makes them targets for introduction into other plants. The seagrass copies of *SOS3* contain up to 205 uncharged amino acids at the beginning or end of the protein sequences, which are not present in the terrestrial orthologues. These uncharged regions may represent intrinsically disordered regions. These regions may represent adaptations to marine life as disordered regions have been shown to change conformation in response to salinity (Müller-Spätth *et al.*, 2010; Wohl *et al.*, 2021). Exactly how these conformation



changes lead to increased salinity tolerance is currently unknown. The additional *SOS3* copies may help *Zostera* spp. survive in different salinity conditions, but there are no studies comparing seagrass salinity tolerance across salinity gradients. An expanded *SOS* pathway would explain why *Z. muelleri* can survive as an intertidal and estuarine species, maintaining photosynthesis in as little as 15% salinity of normal seawater (Kerr and Strother, 1985). Another explanation may be sexual reproduction, where freshwater pulses initiate seed germination in *Z. muelleri*, and additional *SOS3* copies may assist in responding to freshwater pulses (Stafford-Bell *et al.*, 2016).

Terpenoids have a well-known role in biotic and abiotic stress response and are used by many terrestrial plants to defend against herbivores and pathogens, including signalling to beneficial organisms (Pichersky and Raguso, 2018). One example is cotton: when cotton is infested by corn earworm caterpillars, terpenoids are emitted by the plant to attract insects that feed on corn earworm caterpillars (McCall *et al.*, 1994). However, many terpenoids have low solubility in water (Martins *et al.*, 2017), which implies that insoluble terpenoids cannot be used as a signal underwater or may even be detrimental to seagrasses. High herbivory rates on seagrasses by turtles, dugongs, fish, and invertebrates suggest that non-terpenoid-dependent pathways occur in plant signalling underwater. We found no terpenoid biosynthesis genes in all four seagrasses, except for a single, highly diverged copy in *P. australis*, indicating that seagrasses do not rely on terpenoids for defence signalling.

We compared gene content across terrestrial plants. Most of the GO-terms observed to be lost here were previously reported as lost in seagrasses (Golicz *et al.*, 2015; Lee *et al.*, 2016; Lee *et al.*, 2018; Olsen *et al.*, 2016). Genes present in duckweeds and microalgae but lost in seagrasses and terrestrial plants were linked to several GO-terms such as ‘response to ethylene’ (GO:0009723), ‘floral whorl development’ (GO:0048438), or ‘wax biosynthesis’ (GO:0010025) indicating that the loss of these genes was not essential for adaptation to aquatic life.

## Conclusions

We have presented two new seagrass draft genome assemblies for *Amphibolis antarctica* and *Posidonia australis*. These two genome assemblies represent the second lineage of plants, Cymodoceaceae and Posidoniaceae, that have returned to the sea after the previously published genome assemblies for Zosteraceae. We found large differences in genome size, but unlike *Z. muelleri* with a known whole-genome duplication, the size of the large *P. australis* genome is driven by repeat expansion. We compared the four available seagrass genomes and found patterns of gene loss, rather than gene diversification, with many additional species-specific gene losses not directly tied to adaptations to aquatic life. The ethylene pathway is partially present in *A. antarctica* and almost fully present in *P. australis*, which may mean that loss of ethylene pathways may not be associated with adaptations to aquatic life, as previously thought. *A. antarctica* can only synthesise ethylene precursors (ACC) and ethylene itself, but all ethylene receptors are lost, which may mean that *A. antarctica* is in a mutualistic relationship with ACC-metabolising bacteria.

Other forms of complex seagrass-bacteria mutualistic relationships have recently been discovered (Tarquinio *et al.*, 2019), including the deposition of sugars unavailable to bacteria due to phenolic compounds (Sogin *et al.*, 2021) or methane production by archaea living in seagrass meadows (Schorn *et al.*, 2022). Future studies will focus on the interaction between the loss of ethylene genes in seagrasses and the role of host microbiomes in providing critical processes for survival (Zilber-Rosenberg and Rosenberg, 2008). Future studies will also include genome assemblies representing the third lineage that has returned to the sea, Hydrocharitaceae, including Najadaceae and Hydrilloideae (*Halophila* sp).

## Methods

### Genome assemblies

Tissue from *P. australis* and *A. antarctica* were collected from Point Peron, Western Australia (-32.2718 S, 115.6898 E) in April 2013, where meadows of both species were growing adjacent. The meristem and youngest innermost leaf were excised from a single plant for *P. australis* and *A. antarctica*. The growth tips were rinsed in sterile water and closely inspected for any visible external contamination. Seven hundred milligrams of tissue were collected and placed in 5ml tubes, flash-frozen in liquid nitrogen, and pulverised using the 2010 Geno/Grinder (SPEX SamplePrep, Metuchen, NJ, USA). A 100 mg of frozen, powdered plant material was transferred to seven 2ml tubes. The DNA was extracted using the Qiagen DNeasy Power Plant mini kit (Qiagen, Hilden, Germany) following the manufacturer's protocols. The extracted DNA for each of the seven tubes were pooled after elution, and the DNA concentration was quantified with a Qubit fluorometer (Invitrogen, Carlsbad, CA, USA). The quality was confirmed using the LabChip GX Touch (PerkinElmer, Waltham, MA, USA). The extracted DNA was submitted to the Australian Genome Research Facility (AGRF) for library preparation and whole-genome sequencing. Libraries were prepared using the Illumina TruSeq DNA Nano library kit (Illumina, San Diego, CA, USA) according to the manufacturer's protocol and were sequenced on the Illumina NovaSeq 6000 to generate 100Gb of 150bp paired-end reads. The genomes were assembled using MaSuRCA v4.0.1 (Zimin *et al.*, 2013). Transposable elements were annotated using EDTA v1.9.4 (Ou *et al.*, 2019) and classified using TESorter v1.3.0 (database: rexdb-plant) (Neumann *et al.*, 2019; Zhang *et al.*, 2019).

All RNASeq reads were aligned using HISAT2 v2.2.1 (Kim *et al.*, 2019). AUGUSTUS v3.4.0 (Stanke *et al.*, 2006) and GeneMark-ET v 4.64\_(Lomsadze *et al.*, 2014) models were trained using the RNASeq alignments via the BRAKER2 pipeline v2.1.6 (Hoff *et al.*, 2019). These models along with predicted repeats, were used in MAKER2 3.01.03 (Holt and Yandell, 2011) to produce final gene models.

## Assembly comparison

These gene models were translated into protein sequences which were compared using Orthofinder v2.5.2 (Emms and Kelly, 2019) with protein models of *Spirodela polyrhiza* (Wang et al., 2014), *Wolffia australiana* (Park et al., 2021), *Ostreococcus lucimarinus* (Palenik et al., 2007), *Chlamydomonas reinhardtii* (Merchant et al., 2007), *Amborella trichopoda* (Amborella Genome Project et al., 2013), *Arabidopsis thaliana* (Kaul et al., 2000), *Brachipodium distachyon* (Vogel et al., 2010), *Oryza sativa* (International Rice Genome Sequencing Project, 2005), *Physcomitrella patens* (Rensing et al., 2008), *Populus trichocarpa* (Tuskan et al., 2006), *Selaginella moellendorffii* (Banks et al., 2011), *Thellungiella parvula* (Dassanayake et al., 2011), *Vitis vinifera* (Jaillon et al., 2007), and *Zea mays* (Schnable et al., 2009).

Seagrass reads were compared using the *Arabidopsis thaliana* annotation using bowtie2 v2.3.5.1 (Langmead and Salzberg, 2012), and per-gene coverage was calculated using mosdepth v0.3.2 (Pedersen and Quinlan, 2018) and bedtools v2.30.0 (Quinlan and Hall, 2010).

Chloroplast genomes were assembled using GetOrganelle v1.7.5.0 (Bankevich et al., 2012; Jin et al., 2020; Langmead and Salzberg, 2012) using the public *A. thaliana* chloroplast assembly NC\_000932.1 as reference (Sato et al., 1999). Chloroplast genomes were annotated using Chloe (<https://chloe.plastid.org/>).

## Protein comparison

Pfam protein domains were predicted using Interproscan v5.55-88.0 (Jones et al., 2014; Mistry et al., 2021). Proteins of the *EIN3* and *SOS3* orthogroups were aligned using MUSCLE v3.8.1551 (Edgar, 2004). The best protein model of evolution was chosen using modeltest-ng v0.17 (Darriba et al., 2020). The gene-based phylogeny was calculated using that model for 600 bootstraps using raxml-ng v0.9.0 (Kozlov et al., 2019). The resulting phylogenies were drawn using ggmsa v1.1.5 (Yu et al., 2020) and ggtree v3.0.4 (Yu et al., 2017). Multiple sequence alignments were visualised using JalView v2.11 (Waterhouse et al., 2009). GO-annotation was carried out using PANNZER 2 (Medlar et

*et al.*, 2018). GO-enrichment was carried out using topGO v2.44.0 (Alexa and Rahnenführer, 2009) and rrvgo v1.4.4 (Sayols, 2020). All associated GO-terms were used as backgrounds for comparisons involving all plants, while for comparisons involving only seagrass-related GO-terms were used as background.

All other visualisations were generated using R v4.1.0 (R Core Team, 2020) using tidyverse v1.3.1 (Wickham *et al.*, 2019) and ggplot2 v3.3.5 (Wickham, 2016). All analyses in this manuscript are fully reproducible using workflowr v1.6.2 (Blischak *et al.*, 2019) and are available at [https://philippbayer.github.io/Amphibolis\\_Posidonia\\_Comparison/](https://philippbayer.github.io/Amphibolis_Posidonia_Comparison/).

## Acknowledgements

This work is funded by the Australia Research Council (Projects DP180100668, DP1601004497, DP200100762, DP210101932, and DE210100398). This work was supported by resources provided by the Pawsey Supercomputing Centre with funding from the Australian Government and the Government of Western Australia.

## Author contributions

PEB carried out bioinformatics analysis, and PEB and MWF co-wrote the manuscript. MWF, BCM, EAS, GAK sampled seagrasses, MWF, BCM, JP, ASE, JB, and DE contributed to genome sequencing and genomics analyses. JB and DE assisted in writing the manuscript. All authors edited the manuscript.

## Conflicts of interest

The authors declare no competing interest.

## Data availability

Raw read data generated for this study have been deposited in SRA under BioProject PRJNA835502.

The *A. antarctica* and *P. australis* genome assemblies were deposited at GenBank under ID

JAMKPZ000000000 and JAMKQA000000000.1, respectively. All genome sequences and annotations generated for this study are available at <https://www.appliedbioinformatics.com.au/Edwards/index.php/Seagrasses>.

## References

- Abelson A, Reed DC, Edgar GJ, Smith CS, Kendrick GA, Orth RJ, Airoidi L, Silliman B, Beck MW, Krause G.** 2020. Challenges for restoration of coastal marine ecosystems in the anthropocene. *Frontiers in Marine Science* **7**, 544105.
- Alexa A, Rahnenführer J.** 2009. Gene set enrichment analysis with topGO. *Bioconductor Improv* **27**.
- Amborella Genome Project, Albert VA, Barbazuk WB, dePamphilis CW, Der JP, Leebens-Mack J, Ma H, Palmer JD, Rounsley S, Sankoff D.** 2013. The Amborella genome and the evolution of flowering plants. *Science* **342**, 1241089.
- Aragones LV, Lawler IR, Foley WJ, Marsh H.** 2006. Dugong grazing and turtle cropping: grazing optimization in tropical seagrass systems? *Oecologia* **149**, 635-647.
- Baggs EL, Monroe JG, Thanki AS, O'Grady R, Schudoma C, Haerty W, Krasileva KV.** 2020. Convergent loss of an EDS1/PAD4 signaling pathway in several plant lineages reveals coevolved components of plant immunity and drought response. *The Plant Cell* **32**, 2158-2177.
- Bankevich A, Nurk S, Antipov D, Gurevich AA, Dvorkin M, Kulikov AS, Lesin VM, Nikolenko SI, Pham S, Prjibelski AD.** 2012. SPAdes: a new genome assembly algorithm and its applications to single-cell sequencing. *Journal of computational biology* **19**, 455-477.
- Banks JA, Nishiyama T, Hasebe M, Bowman JL, Gribskov M, DePamphilis C, Albert VA, Aono N, Aoyama T, Ambrose BA.** 2011. The Selaginella genome identifies genetic changes associated with the evolution of vascular plants. *Science* **332**, 960-963.
- Blischak JD, Carbonetto P, Stephens M.** 2019. Creating and sharing reproducible research code the workflow way. *F1000Research* **8**.
- Bockelmann A-C, Tams V, Ploog J, Schubert PR, Reusch TBH.** 2013. Quantitative PCR reveals strong spatial and temporal variation of the wasting disease pathogen, *Labyrinthula zosterae* in northern European eelgrass (*Zostera marina*) beds. *PLoS One* **8**, e62169.
- Brakel J, Werner FJ, Tams V, Reusch TBH, Bockelmann A-C.** 2014. Current European *Labyrinthula zosterae* are not virulent and modulate seagrass (*Zostera marina*) defense gene expression. *PLoS One* **9**, e92448.
- Breed MF, Harrison PA, Blyth C, Byrne M, Gaget V, Gellie NJ, Groom SV, Hodgson R, Mills JG, Prowse TA.** 2019. The potential of genomics for restoring ecosystems and biodiversity. *Nature Reviews Genetics* **20**, 615-628.
- Chen J, Zang Y, Shang S, Liang S, Zhu M, Wang Y, Tang X.** 2021. Comparative Chloroplast Genomes of Zosteraceae Species Provide Adaptive Evolution Insights Into Seagrass. *Frontiers in Plant Science* **12**.
- Chen L-Y, Lu B, Morales-Briones DF, Moody ML, Liu F, Hu G-W, Huang C-H, Chen J-M, Wang Q-F.** 2022. Phylogenomic analyses of Alismatales shed light into adaptations to aquatic environments. *Molecular Biology and Evolution*.
- Chini A, Grant JJ, Seki M, Shinozaki K, Loake GJ.** 2004. Drought tolerance established by enhanced expression of the CC-NBS-LRR gene, ADR1, requires salicylic acid, EDS1 and ABI1. *Plant J* **38**, 810-822.
- Crump BC, Wojahn JM, Tomas F, Mueller RS.** 2018. Metatranscriptomics and Amplicon Sequencing Reveal Mutualisms in Seagrass Microbiomes. *Front Microbiol* **9**, 388.

- Darriba D, Posada D, Kozlov AM, Stamatakis A, Morel B, Flouri T.** 2020. ModelTest-NG: a new and scalable tool for the selection of DNA and protein evolutionary models. *Molecular Biology and Evolution* **37**, 291-294.
- Dassanayake M, Oh D-H, Haas JS, Hernandez A, Hong H, Ali S, Yun D-J, Bressan RA, Zhu J-K, Bohnert HJ.** 2011. The genome of the extremophile crucifer *Thellungiella parvula*. *Nature genetics* **43**, 913-918.
- DeRose-Wilson L, Gaut BS.** 2011. Mapping salinity tolerance during *Arabidopsis thaliana* germination and seedling growth. *PLoS One* **6**, e22832.
- Devos KM, Brown JKM, Bennetzen JL.** 2002. Genome Size Reduction through Illegitimate Recombination Counteracts Genome Expansion in *Arabidopsis*. *Genome Research* **12**, 1075-1079.
- Dong Y, Lu X, Song W, Shi L, Zhang M, Zhao H, Jiao Y, Lai J.** 2011. Structural characterization of helitrons and their stepwise capturing of gene fragments in the maize genome. *BMC genomics* **12**, 1-11.
- Dupeyron M, Singh KS, Bass C, Hayward A.** 2019. Evolution of Mutator transposable elements across eukaryotic diversity. *Mobile DNA* **10**, 12.
- Edgar RC.** 2004. MUSCLE: a multiple sequence alignment method with reduced time and space complexity. *BMC bioinformatics* **5**, 1-19.
- Emms DM, Kelly S.** 2019. OrthoFinder: phylogenetic orthology inference for comparative genomics. *Genome biology* **20**, 1-14.
- Fleischmann TT, Scharff LB, Alkatib S, Hasdorf S, Schöttler MA, Bock R.** 2011. Nonessential plastid-encoded ribosomal proteins in tobacco: a developmental role for plastid translation and implications for reductive genome evolution. *The Plant Cell* **23**, 3137-3155.
- Fourqurean JW, Duarte CM, Kennedy H, Marbà N, Holmer M, Mateo MA, Apostolaki ET, Kendrick GA, Krause-Jensen D, McGlathery KJ.** 2012. Seagrass ecosystems as a globally significant carbon stock. *Nature geoscience* **5**, 505-509.
- Fraschetti S, McOwen C, Papa L, Papadopoulou N, Bilan M, Boström C, Capdevila P, Carreiro-Silva M, Carugati L, Cebrian E.** 2021. Where is more important than how in coastal and marine ecosystems restoration. *Frontiers in Marine Science* **8**, 626843.
- Fraser MW, Kendrick GA, Statton J, Hovey RK, Zavala-Perez A, Walker DI.** 2014. Extreme climate events lower resilience of foundation seagrass at edge of biogeographical range. *Journal of Ecology* **102**, 1528-1536.
- Fredley J, Durako MJ, Hall MO.** 2019. Multivariate analyses link macrophyte and water quality indicators to seagrass die-off in Florida Bay. *Ecological Indicators* **101**, 692-701.
- Gantt JS, Baldauf SL, Calie PJ, Weeden NF, Palmer JD.** 1991. Transfer of rpl22 to the nucleus greatly preceded its loss from the chloroplast and involved the gain of an intron. *The EMBO journal* **10**, 3073-3078.
- Golicz AA, Schliep M, Lee HT, Larkum AW, Dolferus R, Batley J, Chan C-KK, Sablok G, Ralph PJ, Edwards D.** 2015. Genome-wide survey of the seagrass *Zostera muelleri* suggests modification of the ethylene signalling network. *Journal of experimental botany* **66**, 1489-1498.
- Graham OJ, Aoki LR, Stephens T, Stokes J, Dayal S, Rappazzo B, Gomes CP, Harvell CD.** 2021. Effects of Seagrass Wasting Disease on Eelgrass Growth and Belowground Sugar in Natural Meadows. *Frontiers in Marine Science* **8**.
- Hartman S, Sasidharan R, Voeselek LACJ.** 2021. The role of ethylene in metabolic acclimations to low oxygen. *New Phytologist* **229**, 64-70.
- Hashimoto M, Endo T, Peltier G, Tasaka M, Shikanai T.** 2003. A nucleus-encoded factor, CRR2, is essential for the expression of chloroplast ndhB in *Arabidopsis*. *The Plant Journal* **36**, 541-549.
- Hawkins JS, Proulx SR, Rapp RA, Wendel JF.** 2009. Rapid DNA loss as a counterbalance to genome expansion through retrotransposon proliferation in plants. *Proceedings of the National Academy of Sciences* **106**, 17811-17816.
- Hoff KJ, Lomsadze A, Borodovsky M, Stanke M.** 2019. Whole-Genome Annotation with BRAKER. *Methods Mol Biol* **1962**, 65-95.

- Holt C, Yandell M.** 2011. MAKER2: an annotation pipeline and genome-database management tool for second-generation genome projects. *BMC bioinformatics* **12**, 491.
- International Rice Genome Sequencing Project.** 2005. The map-based sequence of the rice genome. *Nature* **436**, 793-800.
- Jaillon O, Aury J-M, Noel B, Policriti A, Clepet C, Cassagrande A, Choisne N, Aubourg S, Vitulo N, Jubin C.** 2007. The grapevine genome sequence suggests ancestral hexaploidization in major angiosperm phyla. *Nature* **449**, 463-467.
- Janssen T, Bremer K.** 2004. The age of major monocot groups inferred from 800+ rbcL sequences. *Botanical Journal of the Linnean Society* **146**, 385-398.
- Jiang N, Bao Z, Zhang X, Eddy SR, Wessler SR.** 2004. Pack-MULE transposable elements mediate gene evolution in plants. *Nature* **431**, 569-573.
- Jin J-J, Yu W-B, Yang J-B, Song Y, DePamphilis CW, Yi T-S, Li D-Z.** 2020. GetOrganelle: a fast and versatile toolkit for accurate de novo assembly of organelle genomes. *Genome biology* **21**, 1-31.
- Jones P, Binns D, Chang H-Y, Fraser M, Li W, McAnulla C, McWilliam H, Maslen J, Mitchell A, Nuka G.** 2014. InterProScan 5: genome-scale protein function classification. *Bioinformatics* **30**, 1236-1240.
- Kanaoka MM, Pillitteri LJ, Fujii H, Yoshida Y, Bogenschutz NL, Takabayashi J, Zhu J-K, Torii KU.** 2008. SCREAM/ICE1 and SCREAM2 specify three cell-state transitional steps leading to arabidopsis stomatal differentiation. *The Plant Cell* **20**, 1775-1785.
- Kato Y, Aoi K, Omori Y, Takahata N, Satta Y.** 2003. Phylogenetic analyses of *Zostera* species based on rbcL and matK nucleotide sequences: implications for the origin and diversification of seagrasses in Japanese waters. *Genes & genetic systems* **78**, 329-342.
- Kaul S, Koo HL, Jenkins J, Rizzo M, Rooney T, Tallon LJ, Feldblyum T, Nierman W, Benito M-I, Lin X.** 2000. Analysis of the genome sequence of the flowering plant *Arabidopsis thaliana*. *Nature* **408**, 796-815.
- Kerr EA, Strother S.** 1985. Effects of irradiance, temperature and salinity on photosynthesis of *Zostera muelleri*. *Aquatic Botany* **23**, 177-183.
- Kim D, Paggi JM, Park C, Bennett C, Salzberg SL.** 2019. Graph-based genome alignment and genotyping with HISAT2 and HISAT-genotype. *Nat Biotechnol* **37**, 907-915.
- Kim HT, Kim JS, Moore MJ, Neubig KM, Williams NH, Whitten WM, Kim J-H.** 2015a. Seven new complete plastome sequences reveal rampant independent loss of the *ndh* gene family across orchids and associated instability of the inverted repeat/small single-copy region boundaries. *PLoS One* **10**, e0142215.
- Kim YS, Lee M, Lee J-H, Lee H-J, Park C-M.** 2015b. The unified ICE-CBF pathway provides a transcriptional feedback control of freezing tolerance during cold acclimation in *Arabidopsis*. *Plant Molecular Biology* **89**, 187-201.
- Kozlov AM, Darriba D, Flouri T, Morel B, Stamatakis A.** 2019. RAXML-NG: a fast, scalable and user-friendly tool for maximum likelihood phylogenetic inference. *Bioinformatics* **35**, 4453-4455.
- Kumar S, Stecher G, Suleski M, Hedges SB.** 2017. TimeTree: a resource for timelines, timetrees, and divergence times. *Molecular Biology and Evolution* **34**, 1812-1819.
- Langmead B, Salzberg SL.** 2012. Fast gapped-read alignment with Bowtie 2. *Nature Methods* **9**, 357-359.
- Lee H, Golicz AA, Bayer PE, Jiao Y, Tang H, Paterson AH, Sablok G, Krishnaraj RR, Chan C-KK, Batley J.** 2016. The genome of a southern hemisphere seagrass species (*Zostera muelleri*). *Plant physiology* **172**, 272-283.
- Lee H, Golicz AA, Bayer PE, Severn-Ellis AA, Chan C-KK, Batley J, Kendrick GA, Edwards D.** 2018. Genomic comparison of two independent seagrass lineages reveals habitat-driven convergent evolution. *Journal of experimental botany* **69**, 3689-3702.
- Leigh SC, Papastamatiou YP, German DP.** 2018. Seagrass digestion by a notorious 'carnivore'. *Proceedings of the Royal Society B: Biological Sciences* **285**, 20181583.
- Les DH, Cleland MA, Waycott M.** 1997. Phylogenetic studies in Alismatidae, II: evolution of marine angiosperms (seagrasses) and hydrophily. *Systematic Botany*, 443-463.



- Les DH, Crawford DJ, Kimball RT, Moody ML, Landolt E.** 2003. Biogeography of discontinuously distributed hydrophytes: a molecular appraisal of intercontinental disjunctions. *International Journal of Plant Sciences* **164**, 917-932.
- Lin CS, Chen JJW, Chiu CC, Hsiao HCW, Yang CJ, Jin XH, Leebens-Mack J, de Pamphilis CW, Huang YT, Yang LH, Chang WJ, Kui L, Wong GK, Hu JM, Wang W, Shih MC.** 2017. Concomitant loss of NDH complex-related genes within chloroplast and nuclear genomes in some orchids. *Plant J* **90**, 994-1006.
- Lin Q, Ané C, Givnish TJ, Graham SW.** 2021. A new carnivorous plant lineage (*Triantha*) with a unique sticky-inflorescence trap. *Proceedings of the National Academy of Sciences* **118**.
- Liu Z, Xie Q, Tang F, Wu J, Dong W, Wang C, Gao C.** 2021. The ThSOS3 Gene Improves the Salt Tolerance of Transgenic *Tamarix hispida* and *Arabidopsis thaliana*. *Frontiers in Plant Science* **11**.
- Lomsadze A, Burns PD, Borodovsky M.** 2014. Integration of mapped RNA-Seq reads into automatic training of eukaryotic gene finding algorithm. *Nucleic acids research* **42**, e119-e119.
- Ma J, Devos KM, Bennetzen JL.** 2004. Analyses of LTR-retrotransposon structures reveal recent and rapid genomic DNA loss in rice. *Genome Res* **14**, 860-869.
- Ma M, Liu Y, Bai C, Yang Y, Sun Z, Liu X, Zhang S, Han X, Yong JWH.** 2021a. The physiological functionality of PGR5/PGRL1-dependent cyclic electron transport in sustaining photosynthesis. *Frontiers in Plant Science*, 1313.
- Ma M, Zhong M, Zhang Q, Zhao W, Wang M, Luo C, Xu B.** 2021b. A genome-wide analysis of the chloroplast NADH dehydrogenase-like genes in *Zostera marina*. *Journal of Oceanology and Limnology*, 1-22.
- Ma X, Olsen J, Reusch T, Procaccini G, Kudrna D, Williams M, Grimwood J, Rajasekar S, Jenkins J, Schmutz J, Van de Peer Y.** 2021c. Improved chromosome-level genome assembly and annotation of the seagrass, *Zostera marina* (eelgrass) [version 1; peer review: 1 approved]. *F1000Research* **10**.
- Maher WA, Foster SD, Taylor AM, Krikowa F, Duncan EG, Chariton AA.** 2011. Arsenic distribution and species in two *Zostera capricorni* seagrass ecosystems, New South Wales, Australia. *Environmental Chemistry* **8**, 9-18.
- Martin BC, Middleton JA, Skrzypek G, Kendrick GA, Cosgrove J, Fraser MW.** 2022. Composition of seagrass root associated bacterial communities are linked to nutrients and heavy metal concentrations in an anthropogenically influenced estuary. *Frontiers in Marine Science* **8**, 768864.
- Medlar AJ, Törönen P, Zosa E, Holm L.** 2018. Pannzer 2: Annotate a complete proteome in minutes. *Nucl. Acids Res* **43**, W24-W29.
- Merchant SS, Prochnik SE, Vallon O, Harris EH, Karpowicz SJ, Witman GB, Terry A, Salamov A, Fritz-Laylin LK, Maréchal-Drouard L.** 2007. The *Chlamydomonas* genome reveals the evolution of key animal and plant functions. *Science* **318**, 245-250.
- Meurer J, Berger A, Westhoff P.** 1996. A nuclear mutant of *Arabidopsis* with impaired stability on distinct transcripts of the plastid psbB, psbD/C, ndhH, and ndhC operons. *The Plant Cell* **8**, 1193-1207.
- Mistry J, Chuguransky S, Williams L, Qureshi M, Salazar GA, Sonnhammer ELL, Tosatto SCE, Paladin L, Raj S, Richardson LJ.** 2021. Pfam: The protein families database in 2021. *Nucleic acids research* **49**, D412-D419.
- Müller-Späth S, Soranno A, Hirschfeld V, Hofmann H, Rügger S, Reymond L, Nettels D, Schuler B.** 2010. Charge interactions can dominate the dimensions of intrinsically disordered proteins. *Proceedings of the National Academy of Sciences* **107**, 14609-14614.
- Munekage Y, Hojo M, Meurer J, Endo T, Tasaka M, Shikanai T.** 2002. PGR5 is involved in cyclic electron flow around photosystem I and is essential for photoprotection in *Arabidopsis*. *Cell* **110**, 361-371.
- Neumann P, Novák P, Hošťáková N, Macas J.** 2019. Systematic survey of plant LTR-retrotransposons elucidates phylogenetic relationships of their polyprotein domains and provides a reference for element classification. *Mobile DNA* **10**, 1-17.

- Olsen JL, Rouzé P, Verhelst B, Lin Y-C, Bayer T, Collen J, Dattolo E, De Paoli E, Dittami S, Maumus F.** 2016. The genome of the seagrass *Zostera marina* reveals angiosperm adaptation to the sea. *Nature* **530**, 331-335.
- Olsen YS, Fraser MW, Martin BC, Pomeroy A, Lowe R, Pedersen O, Kendrick GA.** 2018. In situ oxygen dynamics in rhizomes of the seagrass *Posidonia sinuosa*: impact of light, water column oxygen, current speed and wave velocity. *Marine Ecology Progress Series* **590**, 67-77.
- Orth RJ, Lefcheck JS, McGlathery KS, Aoki L, Luckenbach MW, Moore KA, Oreska MPJ, Snyder R, Wilcox DJ, Lusk B.** 2020. Restoration of seagrass habitat leads to rapid recovery of coastal ecosystem services. *Science Advances* **6**, eabc6434.
- Ou S, Su W, Liao Y, Chougule K, Agda JR, Hellinga AJ, Lugo CSB, Elliott TA, Ware D, Peterson T.** 2019. Benchmarking transposable element annotation methods for creation of a streamlined, comprehensive pipeline. *Genome biology* **20**, 1-18.
- Palenik B, Grimwood J, Aerts A, Rouzé P, Salamov A, Putnam N, Dupont C, Jorgensen R, Derelle E, Rombauts S.** 2007. The tiny eukaryote *Ostreococcus* provides genomic insights into the paradox of plankton speciation. *Proceedings of the National Academy of Sciences* **104**, 7705-7710.
- Park H, Park JH, Lee Y, Woo DU, Jeon HH, Sung YW, Shim S, Kim SH, Lee KO, Kim J-Y.** 2021. Genome of the world's smallest flowering plant, *Wolffia australiana*, helps explain its specialized physiology and unique morphology. *Communications biology* **4**, 1-12.
- Pedersen BS, Quinlan AR.** 2018. Mosdepth: quick coverage calculation for genomes and exomes. *Bioinformatics* **34**, 867-868.
- Pfeifer L, van Erven G, Sinclair EA, Duarte CM, Kabel MA, Classen B.** 2022. Profiling the cell walls of seagrasses from A (Amphibolis) to Z (Zostera). *BMC plant biology* **22**, 1-18.
- Price A, Maher W, Kirby J, Krikowa F, Duncan E, Taylor A, Potts J.** 2012. Distribution of arsenic species in an open seagrass ecosystem: relationship to trophic groups, habitats and feeding zones. *Environmental Chemistry* **9**, 77-88.
- Pruitt RN, Locci F, Wanke F, Zhang L, Saile SC, Joe A, Karelina D, Hua C, Fröhlich K, Wan W-L.** 2021. The EDS1-PAD4-ADR1 node mediates Arabidopsis pattern-triggered immunity. *Nature* **598**, 495-499.
- Quinlan A, Hall I.** 2010. BEDTools: a flexible suite of utilities for comparing genomic features. *Bioinformatics* **26**, 841-842.
- R Core Team.** 2020. R: A language and environment for statistical computing.
- Rensing SA, Lang D, Zimmer AD, Terry A, Salamov A, Shapiro H, Nishiyama T, Perroud P-F, Lindquist EA, Kamisugi Y.** 2008. The Physcomitrella genome reveals evolutionary insights into the conquest of land by plants. *Science* **319**, 64-69.
- Ruwe H, Gutmann B, Schmitz-Linneweber C, Small I, Kindgren P.** 2019. The E domain of CRR2 participates in sequence-specific recognition of RNA in plastids. *New Phytol* **222**, 218-229.
- Sato S, Nakamura Y, Kaneko T, Asamizu E, Tabata S.** 1999. Complete structure of the chloroplast genome of *Arabidopsis thaliana*. *DNA research* **6**, 283-290.
- Sayols S.** 2020. rrvgo: a Bioconductor package to reduce and visualize Gene Ontology terms.
- Schnable PS, Ware D, Fulton RS, Stein JC, Wei F, Pasternak S, Liang C, Zhang J, Fulton L, Graves TA.** 2009. The B73 maize genome: complexity, diversity, and dynamics. *Science* **326**, 1112-1115.
- Schorn S, Ahmerkamp S, Bullock E, Weber M, Lott C, Liebeke M, Lavik G, Kuypers MMM, Graf JS, Milucka J.** 2022. Diverse methylophilic methanogenic archaea cause high methane emissions from seagrass meadows. *Proceedings of the National Academy of Sciences* **119**, e2106628119.
- Shikanai T.** 2014. Central role of cyclic electron transport around photosystem I in the regulation of photosynthesis. *Current opinion in biotechnology* **26**, 25-30.
- Singh RP, Shelke GM, Kumar A, Jha PN.** 2015. Biochemistry and genetics of ACC deaminase: a weapon to "stress ethylene" produced in plants. *Frontiers in microbiology* **6**, 937.
- Sirpiö S, Holmström M, Battchikova N, Aro E-M.** 2009. AtCYP20-2 is an auxiliary protein of the chloroplast NAD (P) H dehydrogenase complex. *FEBS letters* **583**, 2355-2358.
- Sogin EM, Michellod D, Gruber-Vodicka H, Bourceau P, Geier B, Meier DV, Seidel M, Ahmerkamp S, Schorn S, D'Angelo G.** 2021. Sugars dominate the seagrass rhizosphere. *bioRxiv*, 797522.

- Stafford-Bell RE, Chariton AA, Robinson RW.** 2016. Germination and early-stage development in the seagrass, *Zostera muelleri* Irmisch ex Asch. in response to multiple stressors. *Aquatic Botany* **128**, 18-25.
- Stanke M, Keller O, Gunduz I, Hayes A, Waack S, Morgenstern B.** 2006. AUGUSTUS: ab initio prediction of alternative transcripts. *Nucleic Acids Res* **34**, W435-439.
- Supek F, Bosnjak M, Skunca N, Smuc T.** 2011. REVIGO summarizes and visualizes long lists of gene ontology terms. *PLoS One* **6**, e21800.
- Tan Y, Zhang QS, Zhao W, Liu Z, Ma MY, Zhong MY, Wang MX.** 2020. The highly efficient NDH-dependent photosystem I cyclic electron flow pathway in the marine angiosperm *Zostera marina*. *Photosynthesis research* **144**, 49-62.
- Tarquino F, Hyndes GA, Laverock B, Koenders A, Sävström C.** 2019. The seagrass holobiont: understanding seagrass-bacteria interactions and their role in seagrass ecosystem functioning. *FEMS microbiology letters* **366**, fnz057.
- Tuskan GA, DiFazio S, Jansson S, Bohlmann J, Grigoriev I, Hellsten U, Putnam N, Ralph S, Rombauts S, Salamov A.** 2006. The genome of black cottonwood, *Populus trichocarpa* (Torr. & Gray). *Science* **313**, 1596-1604.
- Vitte C, Panaud O.** 2005. LTR retrotransposons and flowering plant genome size: emergence of the increase/decrease model. *Cytogenetic and Genome Research* **110**, 91-107.
- Vogel J, Garvin D, Mockler TC, Schmutz J, Rokhsar D, Bevan M.** 2010. Genome sequencing and analysis of the model grass *Brachypodium distachyon*.
- Wang W, Haberger G, Gundlach H, Gläßer C, Nussbaumer T, Luo M, Lomsadze A, Borodovsky M, Kerstetter R, Shanklin J.** 2014. The *Spirodela polyrhiza* genome reveals insights into its neotenus reduction fast growth and aquatic lifestyle. *Nature communications* **5**, 1-13.
- Waterhouse AM, Procter JB, Martin DM, Clamp M, Barton GJ.** 2009. Jalview Version 2—a multiple sequence alignment editor and analysis workbench. *Bioinformatics* **25**, 1189-1191.
- Wicke S, Schäferhoff B, Depamphilis CW, Müller KF.** 2014. Disproportional plastome-wide increase of substitution rates and relaxed purifying selection in genes of carnivorous *Lentibulariaceae*. *Molecular Biology and Evolution* **31**, 529-545.
- Wickham H.** 2016. *ggplot2: elegant graphics for data analysis*: springer.
- Wickham H, Averick M, Bryan J, Chang W, McGowan LDA, François R, Grolemund G, Hayes A, Henry L, Hester J.** 2019. Welcome to the Tidyverse. *Journal of Open Source Software* **4**, 1686.
- Wissler L, Codoñer FM, Gu J, Reusch TBH, Olsen JL, Procaccini G, Bornberg-Bauer E.** 2011. Back to the sea twice: identifying candidate plant genes for molecular evolution to marine life. *BMC Evolutionary Biology* **11**, 8.
- Wohl S, Jakubowski M, Zheng W.** 2021. Salt-dependent conformational changes of intrinsically disordered proteins. *The Journal of Physical Chemistry Letters* **12**, 6684-6691.
- Yamori W, Makino A, Shikanai T.** 2016. A physiological role of cyclic electron transport around photosystem I in sustaining photosynthesis under fluctuating light in rice. *Scientific reports* **6**, 20147.
- Yang Q, Chen ZZ, Zhou XF, Yin HB, Li X, Xin XF, Hong XH, Zhu JK, Gong Z.** 2009. Overexpression of SOS (Salt Overly Sensitive) genes increases salt tolerance in transgenic *Arabidopsis*. *Mol Plant* **2**, 22-31.
- Yu G, Smith DK, Zhu H, Guan Y, Lam TTY.** 2017. ggtree: an R package for visualization and annotation of phylogenetic trees with their covariates and other associated data. *Methods in Ecology and Evolution* **8**, 28-36.
- Yu G, Zhou L, Huang H.** 2020. ggmsa: plot multiple sequence alignment using “ggplot2.”
- Zhang R-G, Wang Z-X, Ou S, Li G-Y.** 2019. TESorter: lineage-level classification of transposable elements using conserved protein domains. *bioRxiv*, 800177.
- Zhong Y, Cheng Z-MM.** 2016. A unique RPW8-encoding class of genes that originated in early land plants and evolved through domain fission, fusion, and duplication. *Scientific reports* **6**, 1-13.
- Zilber-Rosenberg I, Rosenberg E.** 2008. Role of microorganisms in the evolution of animals and plants: the hologenome theory of evolution. *FEMS microbiology reviews* **32**, 723-735.

**Zimin AV, Marcais G, Puiu D, Roberts M, Salzberg SL, Yorke JA.** 2013. The MaSuRCA genome assembler. *Bioinformatics* **29**, 2669-2677.

## Tables

Table 1: Comparison of two published seagrass genome assemblies with two new seagrass genome assemblies

|                                                      | <i>Z. marina</i>                                           | <i>Z. muelleri</i>       | <i>A. antarctica</i> | <i>P. australis</i> |
|------------------------------------------------------|------------------------------------------------------------|--------------------------|----------------------|---------------------|
| Reference                                            | Ma <i>et al.</i> (2021c);<br>Olsen <i>et al.</i><br>(2016) | Lee <i>et al.</i> (2016) | This study           | This study          |
| Estimated genome size (Mbp)                          | 259                                                        | 889                      | 233                  | 1,399               |
| Genome assembly size (Mbp, excluding <1 Kbp contigs) | 202                                                        | 632                      | 244                  | 1,215               |
| Number of scaffolds > 1Kbp                           | 304 (6 pseudomolecules)                                    | 35,334                   | 16,916               | 258,843             |
| Number of predicted gene models                      | 20,450                                                     | 35,875                   | 16,176               | 21,126              |

## Figure legends

*Figure 1: Gene coverage and gene size differences in the four seagrasses based on aligning sequencing reads of the five species with Arabidopsis coding sequences (A, C, D), or by comparing chloroplast gene annotation lengths with the Arabidopsis annotation (B). A) Ethylene pathway-related genes, B) ndh chloroplast genes, C) ndh-related nuclear genes, and D) stomata-related genes.*

*Figure 2: Multiple sequence alignment for the EIN3 orthogroup showing proteins of A. thaliana, O. sativa, and three of the four seagrasses (no EIN3 orthologues in A. antarctica). Amino-acids are coloured by the ClustalX colouring scheme (orange: glycine G; gold: proline P; blue: small and hydrophobic amino acids A, V, L, I, M, F, W; green: hydroxyl and amine amino acids S, T, N, Q; magenta: negative-charged amino acids D, E; red: positive-charged amino acids R, K; dark-blue: histidine H and tyrosine Y).*

*Figure 3: Multiple sequence alignment for the SOS3 orthogroup showing proteins of A. thaliana, O. sativa, and all four seagrasses. Amino acids are coloured using the ClustalX colouring scheme (orange: glycine G; gold: proline P; blue: small and hydrophobic amino acids A, V, L, I, M, F, W; green: hydroxyl and amine amino acids S, T, N, Q; magenta: negative-charged amino acids D, E; red: positive-charged amino acids R, K; dark-blue: histidine H and tyrosine Y)*

*Figure 4: A) Shared and unique orthogroups between microalgae, duckweeds, seagrasses and terrestrial plants showing that just 17% of all orthogroups are shared across three groups, with the majority of unique orthogroups (45%) located in the terrestrial plants. B) Enriched Gene Ontology (GO)-terms in genes present only in terrestrial plants but lost in microalgae, duckweeds, and seagrasses. The presence of genes was determined by orthogroup membership. The GO-terms are grouped by semantic similarity using REVIGO (Supek et al., 2011). Size of terms is determined by how often similar terms appear in the GO-enrichment output. Dots are coloured by the log of GO-term enrichment adjusted p-values as determined by topGO, GO-terms with an adjusted p-value above 0.05 were removed (Alexa and Rahnenführer, 2009). The seven GO-terms with the lowest adjusted p-values are labelled.*

Figure 5: A) Shared and unique orthogroups of the four seagrasses showing that 51% of all orthogroups are shared across four species. B) Enriched Gene Ontology (GO)-terms in genes shared by all four seagrasses (intersection), compared with all seagrass GO-terms. The presence of genes was determined by orthogroup membership. The GO-terms are grouped by semantic similarity using REVIGO (Supek et al., 2011). Size of terms is determined by how often similar terms appear in the GO-enrichment output. Dots are coloured by the log of GO-term enrichment adjusted p-values as determined by topGO, GO-terms with an adjusted p-value above 0.05 were removed (Alexa and Rahnenführer, 2009). The eight GO-terms with the lowest adjusted p-values are labelled.

Figure 6: Comparison of repetitive elements in the four assemblies. A) Total size in Mbp of four classes of repetitive elements (LINE, LTR, DNA, unclassified), coding regions, and remaining (non-repetitive) regions. B) Percentage of the total assembly size of four classes of repetitive elements, coding regions, and remaining non-repetitive regions.

Figure 7: Changes in ethylene pathways in *Posidonia australis*, *Amphibolis antarctica*, and *Zostera marina* based on gene presence/absence. *P. australis* retained the entire ethylene pathway, while *A. antarctica* can only produce but not receive ethylene. *Z. marina* only retained one ethylene receptor.

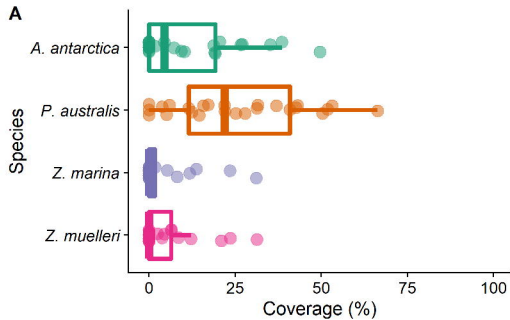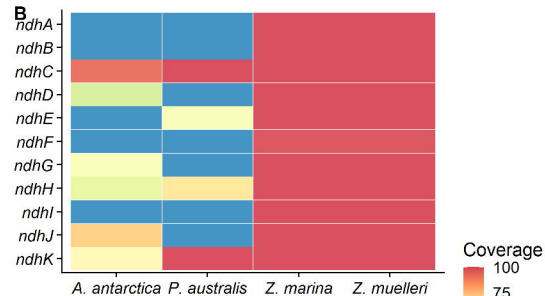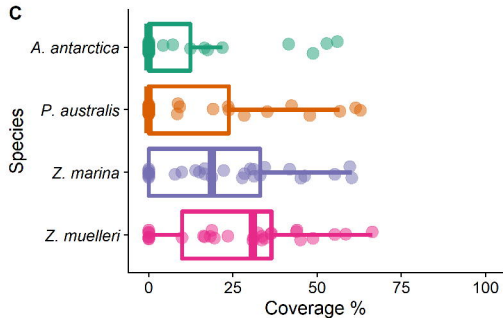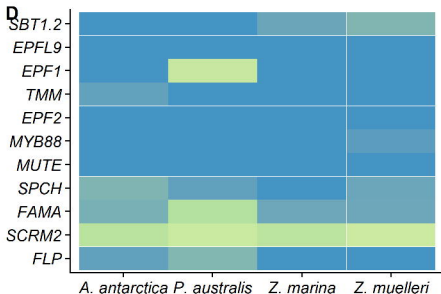



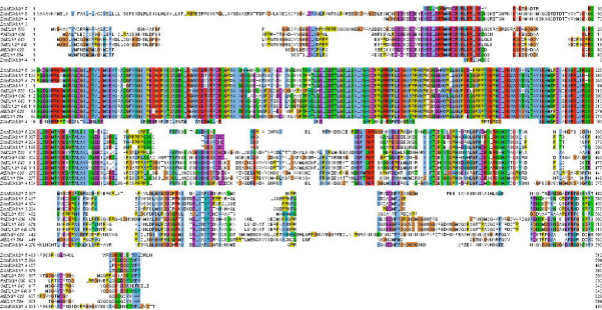

| PROBID     | Q | QUESTION | ANSWER | SCORE | STATUS | DETAILS | TIME |
|------------|---|----------|--------|-------|--------|---------|------|
| PROBID 00  | 8 |          |        |       |        |         |      |
| PROBID 01  | 8 |          |        |       |        |         |      |
| PROBID 02  | 8 |          |        |       |        |         |      |
| PROBID 03  | 8 |          |        |       |        |         |      |
| PROBID 04  | 8 |          |        |       |        |         |      |
| PROBID 05  | 8 |          |        |       |        |         |      |
| PROBID 06  | 8 |          |        |       |        |         |      |
| PROBID 07  | 8 |          |        |       |        |         |      |
| PROBID 08  | 8 |          |        |       |        |         |      |
| PROBID 09  | 8 |          |        |       |        |         |      |
| PROBID 10  | 8 |          |        |       |        |         |      |
| PROBID 11  | 8 |          |        |       |        |         |      |
| PROBID 12  | 8 |          |        |       |        |         |      |
| PROBID 13  | 8 |          |        |       |        |         |      |
| PROBID 14  | 8 |          |        |       |        |         |      |
| PROBID 15  | 8 |          |        |       |        |         |      |
| PROBID 16  | 8 |          |        |       |        |         |      |
| PROBID 17  | 8 |          |        |       |        |         |      |
| PROBID 18  | 8 |          |        |       |        |         |      |
| PROBID 19  | 8 |          |        |       |        |         |      |
| PROBID 20  | 8 |          |        |       |        |         |      |
| PROBID 21  | 8 |          |        |       |        |         |      |
| PROBID 22  | 8 |          |        |       |        |         |      |
| PROBID 23  | 8 |          |        |       |        |         |      |
| PROBID 24  | 8 |          |        |       |        |         |      |
| PROBID 25  | 8 |          |        |       |        |         |      |
| PROBID 26  | 8 |          |        |       |        |         |      |
| PROBID 27  | 8 |          |        |       |        |         |      |
| PROBID 28  | 8 |          |        |       |        |         |      |
| PROBID 29  | 8 |          |        |       |        |         |      |
| PROBID 30  | 8 |          |        |       |        |         |      |
| PROBID 31  | 8 |          |        |       |        |         |      |
| PROBID 32  | 8 |          |        |       |        |         |      |
| PROBID 33  | 8 |          |        |       |        |         |      |
| PROBID 34  | 8 |          |        |       |        |         |      |
| PROBID 35  | 8 |          |        |       |        |         |      |
| PROBID 36  | 8 |          |        |       |        |         |      |
| PROBID 37  | 8 |          |        |       |        |         |      |
| PROBID 38  | 8 |          |        |       |        |         |      |
| PROBID 39  | 8 |          |        |       |        |         |      |
| PROBID 40  | 8 |          |        |       |        |         |      |
| PROBID 41  | 8 |          |        |       |        |         |      |
| PROBID 42  | 8 |          |        |       |        |         |      |
| PROBID 43  | 8 |          |        |       |        |         |      |
| PROBID 44  | 8 |          |        |       |        |         |      |
| PROBID 45  | 8 |          |        |       |        |         |      |
| PROBID 46  | 8 |          |        |       |        |         |      |
| PROBID 47  | 8 |          |        |       |        |         |      |
| PROBID 48  | 8 |          |        |       |        |         |      |
| PROBID 49  | 8 |          |        |       |        |         |      |
| PROBID 50  | 8 |          |        |       |        |         |      |
| PROBID 51  | 8 |          |        |       |        |         |      |
| PROBID 52  | 8 |          |        |       |        |         |      |
| PROBID 53  | 8 |          |        |       |        |         |      |
| PROBID 54  | 8 |          |        |       |        |         |      |
| PROBID 55  | 8 |          |        |       |        |         |      |
| PROBID 56  | 8 |          |        |       |        |         |      |
| PROBID 57  | 8 |          |        |       |        |         |      |
| PROBID 58  | 8 |          |        |       |        |         |      |
| PROBID 59  | 8 |          |        |       |        |         |      |
| PROBID 60  | 8 |          |        |       |        |         |      |
| PROBID 61  | 8 |          |        |       |        |         |      |
| PROBID 62  | 8 |          |        |       |        |         |      |
| PROBID 63  | 8 |          |        |       |        |         |      |
| PROBID 64  | 8 |          |        |       |        |         |      |
| PROBID 65  | 8 |          |        |       |        |         |      |
| PROBID 66  | 8 |          |        |       |        |         |      |
| PROBID 67  | 8 |          |        |       |        |         |      |
| PROBID 68  | 8 |          |        |       |        |         |      |
| PROBID 69  | 8 |          |        |       |        |         |      |
| PROBID 70  | 8 |          |        |       |        |         |      |
| PROBID 71  | 8 |          |        |       |        |         |      |
| PROBID 72  | 8 |          |        |       |        |         |      |
| PROBID 73  | 8 |          |        |       |        |         |      |
| PROBID 74  | 8 |          |        |       |        |         |      |
| PROBID 75  | 8 |          |        |       |        |         |      |
| PROBID 76  | 8 |          |        |       |        |         |      |
| PROBID 77  | 8 |          |        |       |        |         |      |
| PROBID 78  | 8 |          |        |       |        |         |      |
| PROBID 79  | 8 |          |        |       |        |         |      |
| PROBID 80  | 8 |          |        |       |        |         |      |
| PROBID 81  | 8 |          |        |       |        |         |      |
| PROBID 82  | 8 |          |        |       |        |         |      |
| PROBID 83  | 8 |          |        |       |        |         |      |
| PROBID 84  | 8 |          |        |       |        |         |      |
| PROBID 85  | 8 |          |        |       |        |         |      |
| PROBID 86  | 8 |          |        |       |        |         |      |
| PROBID 87  | 8 |          |        |       |        |         |      |
| PROBID 88  | 8 |          |        |       |        |         |      |
| PROBID 89  | 8 |          |        |       |        |         |      |
| PROBID 90  | 8 |          |        |       |        |         |      |
| PROBID 91  | 8 |          |        |       |        |         |      |
| PROBID 92  | 8 |          |        |       |        |         |      |
| PROBID 93  | 8 |          |        |       |        |         |      |
| PROBID 94  | 8 |          |        |       |        |         |      |
| PROBID 95  | 8 |          |        |       |        |         |      |
| PROBID 96  | 8 |          |        |       |        |         |      |
| PROBID 97  | 8 |          |        |       |        |         |      |
| PROBID 98  | 8 |          |        |       |        |         |      |
| PROBID 99  | 8 |          |        |       |        |         |      |
| PROBID 100 | 8 |          |        |       |        |         |      |

A

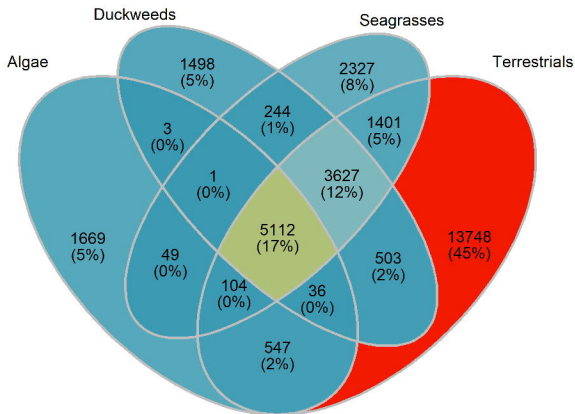

B

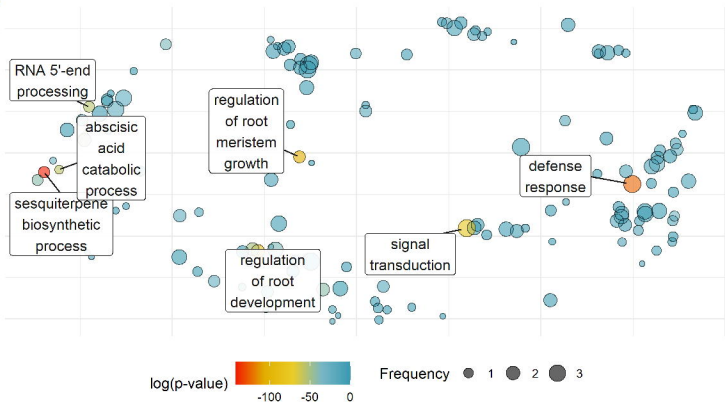

A

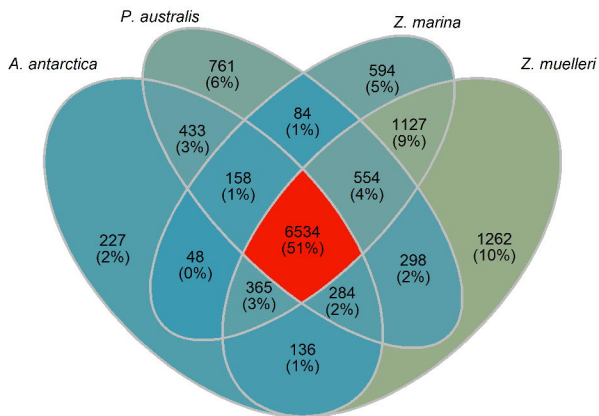

B

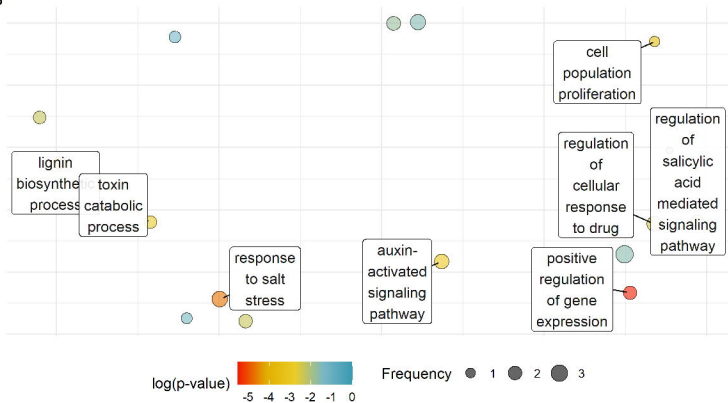

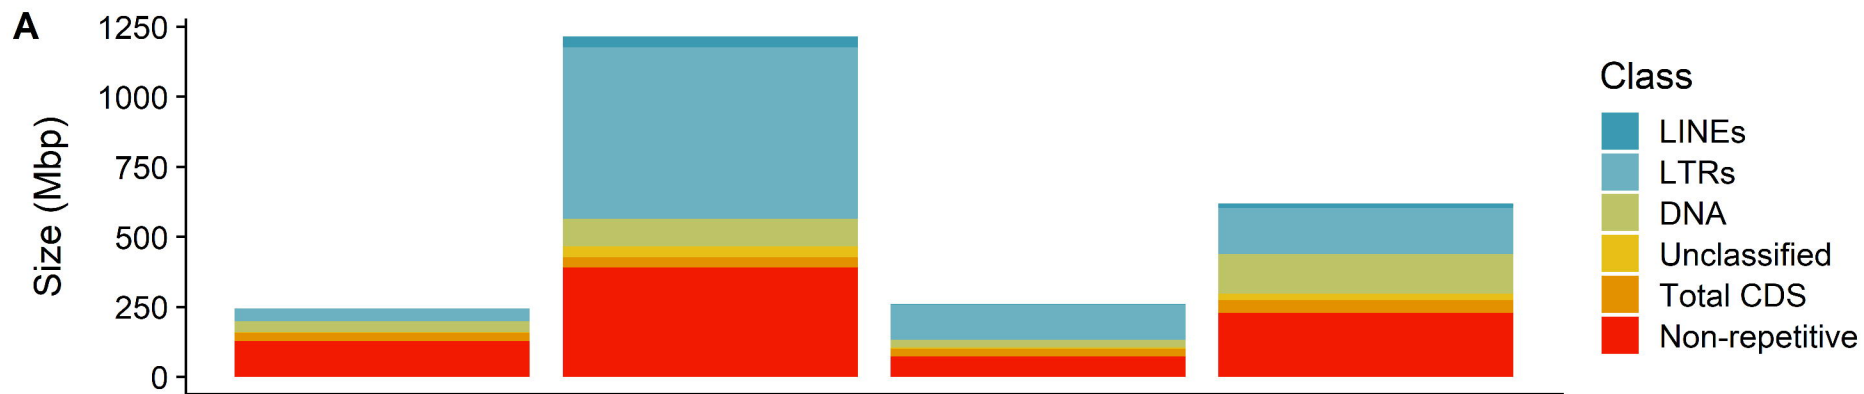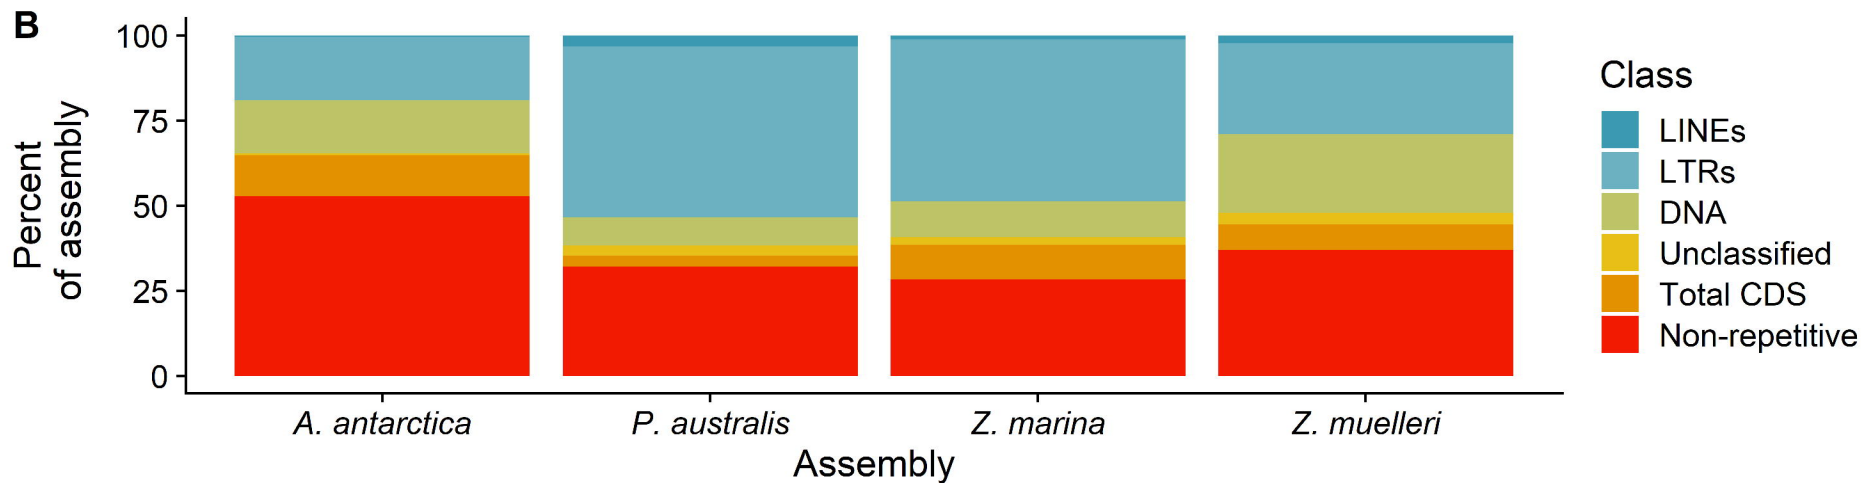

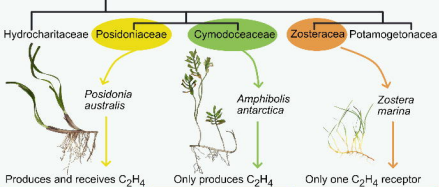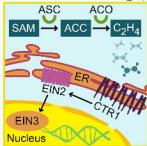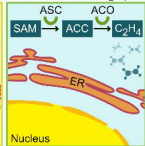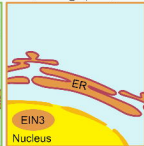

Source: https://www.biorxiv.org/content/10.1101/2022.11.22.517588v1.full.pdf
